# Supplementary material
Source: publisher figshare collection journal article supplement (https://geolsoc.figshare.com/ndownloader/files/13243667)
Supplement: Supplementary file 1 [file 13243667]

## Sheet: Explanations
Tabs
SPO25 olivine	Electron microprobe compositions of olivine in sample SPO25
	Row 1	Line Numbers
	Row 2	X Stage Coordinates
	Row 3	Y Stage Coordinates
	Rows 4-13	oxide weight percents
	Rows 15-22	atoms per formula unit (apfu)
	Rows 23-24	total number of cations and oxygens used to estimate the apfu
SPO25 spinel	Electron microprobe compositions of spinel in sample SPO25
	Row 1	Line Numbers
	Row 2	X Stage Coordinates
	Row 3	Y Stage Coordinates
	Rows 4-11	oxide weight percents
	Rows 13-20	apfu
	Rows 21-22	total number of cations and oxygens used to estimate the apfu
SPO25 cpx	Electron microprobe compositions of clinopyroxene in sample SPO25
	Row 1	Line Numbers
	Row 2	X Stage Coordinates
	Row 3	Y Stage Coordinates
	Rows 4-13	oxide weight percents
	Rows 15-23	apfu
	Rows 24-25	total number of cations and oxygens used to estimate the apfu
SPO25 opx	Electron microprobe compositions of orthopyroxene in sample SPO25
	Row 1	Line Numbers
	Row 2	X Stage Coordinates
	Row 3	Y Stage Coordinates
	Rows 4-14	oxide weight percents
	Rows 16-24	apfu
	Rows 25-26	total number of cations and oxygens used to estimate the apfu
SPO26 amp	Electron microprobe compositions of amphibole in sample SPO26
	Row 1	Line Numbers
	Row 2	X Stage Coordinates
	Row 3	Y Stage Coordinates
	Rows 4-14	oxide weight percents
	Rows 15-24	apfu
	Row 25	total number of oxygens used to estimate the apfu
ICP-MS	Trace element concentrations reported in ppm, major elements reported as weight % oxide (indicated by %).
	Nomeclature: sample number-analysis number_mineral phase_size of beam
	We include the average, standard deviation, and percent error for the analyses

## Sheet: SPO25 olivine
Line Numbers	90	91	93	94	95	96		159	160	161	162	163	164	165	166	169	170
X Stage Coordinates	22.8742	22.8708	22.8647	22.8617	22.8584	22.8553		31.7849	31.8043	31.8235	31.8426	31.8619	31.8811	31.9003	31.9197	31.9776	31.9966
Y Stage Coordinates	87.5014	87.4488	87.3441	87.292	87.2397	87.1867		92.8913	92.8727	92.8542	92.8353	92.8167	92.798	92.7793	92.7608	92.7046	92.6861
SiO2	39.1775	39.2393	39.5153	39.569	39.8964	39.8796		39.7896	39.6415	40.278	40.5748	39.9137	39.7649	40.0264	39.9835	40.1431	40.1518
TiO2	0	0	0.04291	0.032302	0.00115	0		0.148208	0	0.033477	0.04412	0	0.117103	0	0.065042	0.013047	0.06514
Al2O3	0	0	0	0	0	0		0	0	0	0	0	0	0	0	0	0
Cr2O3	0.002139	0.005837	0.002243	0	0.002239	0		0	0	-0.00445	0	0.006626	0	0	0	0.003041	0.047407
Fe2O3	0	0	0	0	0	0		0	0	0	0	0	0	0	0	0	0
FeO	9.55427	9.46419	9.79618	9.43425	9.45055	9.23946		9.59207	9.42079	9.50796	9.5491	8.90706	9.52189	9.77427	9.38636	9.85211	9.67161
MnO	0.163187	0.157159	0.164752	0.129521	0.152174	0.165497		0.136205	0.163855	0.163968	0.150888	0.120455	0.154611	0.168849	0.150971	0.166846	0.121718
MgO	49.9637	50.0369	50.2715	50.3737	50.3751	50.308		50.7524	50.0451	50.7752	49.3731	49.6618	50.287	50.2552	48.6673	50.3024	50.3026
CaO	-0.00059	-0.00026	0	-0.00469	-0.00229	0		0	-0.00057	0	0.0108	0.005577	0.011688	0	0.041606	-0.00275	-0.00282
Total	98.8602	98.9031	99.7929	99.534	99.8753	99.5926		100.418	99.2706	100.754	99.7028	98.6152	99.8572	100.225	98.2948	100.478	100.357
Si	0.965036	0.965815	0.965167	0.967592	0.972876	0.974702		0.965001	0.972689	0.973811	0.994994	0.985443	0.970465	0.974178	0.994565	0.974962	0.976012
Ti	0	0	0.000788164	0.000594001	2.10883e-05	0		0.00270303	0	0.000608659	0.000813618	0	0.00214916	0	0.00121665	0.000238292	0.00119075
Al	0	0	0	0	0	0		0	0	0	0	0	0	0	0	0	0
Cr	4.16574e-05	0.000113589	4.33154e-05	0	4.31671e-05	0		0	0	-8.50632e-05	0	0.000129341	0	0	0	5.83941e-05	0.000911105
Fe2	0.196816	0.19481	0.200101	0.19293	0.192725	0.188853		0.194548	0.193316	0.192243	0.195832	0.183908	0.194338	0.198945	0.195256	0.200107	0.19661
Mn	0.00340469	0.0032764	0.00340842	0.00268264	0.00314304	0.00342608		0.00279793	0.00340541	0.00335777	0.00313404	0.00251896	0.00319599	0.00348078	0.00318076	0.00343225	0.00250606
Mg	1.83472	1.83599	1.83049	1.83632	1.83125	1.83302		1.83495	1.8306	1.83006	1.80494	1.82785	1.82955	1.8234	1.80467	1.82127	1.82284
Ca	-1.5571e-05	-6.85651e-06	0	-0.000122876	-5.98297e-05	0		0	-1.4985e-05	0	0.000283757	0.000147526	0.000305617	0	0.00110883	-7.15596e-05	-7.34442e-05
tot. cat.	3	3	3	3	3	3		3	3	3	3	3	3	3	3	3	3
tot. oxy.	4	4	4	4	4	4		4	4	4	4	4	4	4	4	4	4

## Sheet: SPO25 spinel
Line Numbers	113	110	109	107	106	105	104	103	102	101	100	99	98	97		119	118	117	116	115
X Stage Coordinates	16.4765	16.2581	16.1852	16.0399	15.9668	15.8939	15.821	15.7483	15.6754	15.6028	15.5298	15.4568	15.384	15.311		16.9134	16.8408	16.7679	16.6951	16.6223																	0	0.688423
Y Stage Coordinates	88.6844	88.6222	88.6014	88.5602	88.5399	88.519	88.4982	88.4776	88.4569	88.4362	88.4154	88.3947	88.374	88.3534		88.8083	88.7877	88.7669	88.7464	88.7256																	227.084	0.670082
SiO2	0.176908	0.068141	0.060422	0.062964	0.059164	0.055989	0.067095	0.064417	0.070391	0.061166	0.056265	0.066363	0.05633	0.067164		0.08565	0.08681	0.075458	0.051081	0.092354																	302.894	0.665026
TiO2	0.19936	0.133514	0.19958	0.077229	0.17133	0.058346	0.133625	0.096022	0.171222	0.199402	0.124114	0.208704	0.189959	0.076804		0.16145	0.133433	0.086633	0.190277	0.142934																	453.921	0.664903
Al2O3	45.744	42.5028	41.9627	41.6797	41.3835	41.3241	41.314	41.5068	41.2367	41.2851	41.3447	41.0827	41.5506	41.9325		44.4753	43.2673	42.6352	43.0225	43.7089																	529.787	0.665111
Cr2O3	21.1751	25.03	25.1884	25.879	25.5273	25.4256	25.1469	25.7584	25.7923	25.8964	25.2984	25.861	25.3165	25.0832		23.0962	24.4527	24.6562	24.2517	22.6752																	605.625	0.666543
FeO	14.4957	15.2638	15.3373	15.4569	15.3626	15.3473	15.3241	15.5125	15.3789	15.4081	15.3368	15.277	15.338	15.2694		14.3753	15.0136	15.7267	15.4263	15.5473																	756.996	0.666598
MnO	0.160135	0.163537	0.194454	0.212475	0.211785	0.206733	0.181086	0.210764	0.1747	0.202361	0.22156	0.185088	0.22157	0.164251		0.207644	0.203712	0.232488	0.241769	0.231723																	832.777	0.664124
MgO	17.9671	17.3913	17.0814	17.2051	17.1161	17.2095	17.2468	17.3991	17.0585	17.1534	17.2872	17.1982	17.217	17.2876		17.643	17.3748	16.9589	17.2435	17.1722																	908.27	0.664937
Total	99.9182	100.553	100.024	100.573	99.8317	99.6275	99.4136	100.548	99.8827	100.206	99.6691	99.879	99.8899	99.8809		100.044	100.532	100.372	100.427	99.5705																	1060.05	0.667417
																																					1135.74	0.666775
Si	0.00482371	0.0018775	0.00167782	0.00174159	0.00164822	0.00156146	0.0018738	0.00178095	0.00196201	0.0016995	0.0015678	0.00184924	0.00156666	0.00186467		0.00234906	0.00238612	0.00208613	0.00140738	0.00255499																	1211.59	0.668677	#DIV/0!
Ti	0.00408783	0.00276643	0.00416761	0.0016064	0.00358932	0.00122366	0.00280635	0.00199638	0.00358892	0.0041664	0.00260072	0.00437339	0.00397296	0.00160351		0.00332986	0.00275808	0.00180111	0.00394239	0.00297365																			#DIV/0!
Al	1.47002	1.38021	1.37331	1.35873	1.35875	1.35827	1.35983	1.35246	1.35464	1.35195	1.35777	1.34922	1.36197	1.37206		1.43761	1.40164	1.38918	1.39703	1.42514																	0	0.686305			#DIV/0!
Cr	0.456493	0.545265	0.553	0.565949	0.56226	0.560627	0.555257	0.563049	0.568393	0.568886	0.55734	0.569755	0.55669	0.550585		0.500821	0.531404	0.538937	0.528288	0.495975																	75.4677	0.673516			#DIV/0!
Fe3	0.0556631	0.0652378	0.0619977	0.0686229	0.0685112	0.0755318	0.0755481	0.076933	0.0658691	0.0674346	0.0765494	0.0685825	0.0702637	0.0704182		0.0502116	0.0566639	0.064105	0.0639869	0.067823																	151.275	0.6578
Fe2	0.274882	0.286476	0.29417	0.288923	0.289402	0.282413	0.282353	0.281733	0.29261	0.290593	0.280841	0.287426	0.286482	0.284105		0.279503	0.288451	0.299499	0.291457	0.291881																	226.906	0.66584
Mn	0.00369833	0.00381657	0.00457354	0.00497791	0.00499734	0.00488341	0.00428355	0.00493552	0.00412441	0.00476238	0.00522912	0.00436849	0.00521952	0.00386243		0.00482361	0.00474269	0.00544405	0.00564208	0.00542986																	302.62	0.663174
Mg	0.730331	0.714351	0.707102	0.709447	0.710838	0.715489	0.718043	0.717109	0.708817	0.710511	0.718098	0.714428	0.713838	0.715501		0.721352	0.71195	0.698944	0.70825	0.708218
tot. cat.	3	3	3	3	3	3	3	3	3	3	3	3	3	3		3	3	3	3	3
tot. oxy.	4	4	4	4	4	4	4	4	4	4	4	4	4	4		4	4	4	4	4

## Sheet: SPO25 cpx
Line Numbers	71	72	73	74	75	76		127	128	129	130	131	132		133	134	135	136	137	139	140
X Stage Coordinates	23.3253	23.2764	23.2276	23.1785	23.1298	23.0807		16.7204	16.6971	16.6738	16.6505	16.6272	16.6038		31.0022	31.0454	31.0886	31.1318	31.1751	31.2614	31.3046
Y Stage Coordinates	88.5425	88.478	88.414	88.3499	88.2857	88.2214		87.7366	87.7596	87.7828	87.8059	87.8291	87.8523		93.7858	93.7377	93.6894	93.641	93.5927	93.496	93.4477
SiO2	50.7357	50.9529	50.1895	50.444	50.4922	51.5132		52.3681	51.6267	51.8456	52.2311	51.9021	52.5791		51.9624	51.254	51.5951	51.4277	51.1409	52.5066	52.023
TiO2	0.152208	0.162703	0.141701	0.22706	0.227284	0.216818		0.186194	0.207249	0.089345	0.35796	0.110783	0.197175		0.261729	0.196359	0.046526	0.261622	0.186398	0.132523	0.261545
Al2O3	3.28949	3.476	3.83738	3.44051	3.2932	2.55204		2.62462	3.07831	3.23512	3.22239	3.01224	2.35829		3.37808	3.59934	3.70854	3.68408	4.11999	2.51506	3.06377
Cr2O3	0.777395	0.906946	0.994112	0.925739	0.899432	0.561604		0.587659	0.685993	0.655802	0.751263	0.655552	0.526452		0.863458	1.03808	1.04949	1.05402	0.90071	0.537539	0.576161
FeO	2.4824	2.42357	2.50986	2.47442	2.49848	2.0769		2.01243	2.44893	2.38649	2.44486	2.53313	2.08273		2.17728	2.5004	2.57747	2.3931	2.49432	2.43823	2.27596
MnO	0.088348	0.076667	0.114138	0.104403	0.094405	0.077322		0.105442	0.095837	0.096749	0.120169	0.057284	0.098985		0.05249	0.075741	0.086969	0.088548	0.080494	0.084254	0.08548
MgO	17.3277	17.3061	16.9391	17.3464	17.3261	17.6315		17.4258	17.7888	17.3673	17.272	17.5051	17.5909		16.9008	17.8209	17.0106	16.9564	16.7003	17.6536	17.7006
CaO	24.3139	24.1589	24.4398	24.3519	24.3887	24.998		25.0777	24.2716	24.6659	24.6814	24.4127	25.2356		25.0765	23.7483	24.3447	24.8704	24.6728	24.6508	24.5938
Na2O	0.078589	0.087144	0.076837	0.080551	0.075867	0.051754		0.052392	0.078285	0.058285	0.07087	0.087962	0.071514		0.066039	0.084215	0.074873	0.091122	0.076751	0.069843	0.084057
Total	99.2457	99.551	99.2425	99.395	99.2956	99.6792		100.44	100.282	100.401	101.152	100.277	100.741		100.739	100.317	100.494	100.827	100.373	100.588	100.664
Si	1.85291	1.85565	1.83531	1.83992	1.84393	1.87153		1.89078	1.86449	1.87248	1.87598	1.87637	1.8922		1.87456	1.85042	1.86521	1.85363	1.85154	1.89264	1.87196
Ti	0.00418021	0.00445597	0.00389663	0.00622802	0.00624181	0.00592373		0.00505546	0.00562858	0.00242659	0.00966838	0.00301181	0.00533614		0.00710041	0.00533108	0.00126484	0.00709122	0.0050749	0.00359225	0.00707733
Al	0.141587	0.149198	0.165381	0.1479	0.141741	0.109275		0.111685	0.131025	0.137705	0.136406	0.128345	0.100025		0.143627	0.153152	0.158008	0.156499	0.175799	0.106846	0.129931
Cr	0.0224469	0.0261146	0.0287413	0.0266964	0.0259696	0.0161319		0.0167755	0.0195876	0.0187264	0.0213337	0.0187377	0.0149792		0.0246279	0.0296312	0.0299967	0.0300366	0.0257826	0.0153193	0.0163916
Fe	0.0758172	0.0738139	0.0767541	0.0754777	0.0763049	0.063103		0.0607646	0.0739638	0.072081	0.0734358	0.0765855	0.0626821		0.0656873	0.0754935	0.0779237	0.0721346	0.0755222	0.0734997	0.0684894
Mn	0.00273289	0.00236494	0.00353518	0.00322543	0.00292013	0.0023794		0.00322458	0.0029316	0.00295963	0.00365575	0.00175409	0.00301724		0.00160388	0.00231612	0.00266299	0.00270328	0.0024684	0.00257236	0.00260527
Mg	0.943386	0.939581	0.92341	0.943207	0.943258	0.954942		0.937941	0.957727	0.935074	0.924803	0.943426	0.943738		0.908923	0.959142	0.916746	0.911104	0.901359	0.948629	0.94951
Ca	0.951376	0.942673	0.957528	0.951654	0.954261	0.973067		0.970107	0.939166	0.954466	0.949786	0.945601	0.97303		0.969247	0.918616	0.942936	0.960433	0.957064	0.952016	0.948167
Na	0.00556479	0.00615333	0.0054477	0.00569648	0.00537181	0.00364561		0.00366763	0.00548165	0.0040814	0.00493523	0.00616561	0.00498991		0.00461911	0.00589495	0.00524798	0.0063679	0.00538761	0.00488118	0.00586439
tot. cat.	4	4	4	4	4	4		4	4	4	4	4	4		4	4	4	4	4	4	4
tot. oxy.	6	6	6	6	6	6		6	6	6	6	6	6		6	6	6	6	6	6	6

## Sheet: SPO25 opx
Line Numbers	80	81	82	83	84	85	86	87		126	125	124	123	122	121		141	142	143	144	145	146	147	148	149	150	151	152	153	154	155	156	157
X Stage Coordinates	22.9053	22.9024	22.8992	22.8959	22.8928	22.8898	22.8867	22.8834		17.4235	17.351	17.2779	17.2049	17.1324	17.0593		31.4381	31.4575	31.4765	31.496	31.5153	31.5344	31.5537	31.5728	31.5923	31.6116	31.6308	31.6501	31.6693	31.6886	31.7078	31.7271	31.7463
Y Stage Coordinates	88.0257	87.9732	87.9209	87.8683	87.8161	87.7636	87.7113	87.6588		88.9528	88.9323	88.9116	88.8912	88.8703	88.8497		93.2275	93.2089	93.1905	93.1718	93.1529	93.1342	93.1155	93.0969	93.0783	93.0596	93.0407	93.0223	93.0036	92.9849	92.9661	92.9475	92.9288
SiO2	53.3468	53.5737	53.7351	53.5616	53.5687	51.4438	54.1178	53.9904		55.4508	55.8447	55.6575	55.1229	55.4697	55.4314		54.9102	54.7069	54.5465	54.8064	54.8048	54.4895	54.3882	52.9485	54.3974	54.615	54.5802	54.2593	54.5905	54.7249	54.1946	55.0338	55.4573
TiO2	0.114351	0.083154	0.051971	0.010275	0.083242			0.010208		0.14729	0.063351	0.021578	0.09525		0.084169		0.084674	0.09626		0.053117	0.063673	0.064933	0.06367	0.043007	0.065077	0.074209	0.063787		0.032442	0.128236	0.064096	0.053333
Al2O3	3.0496	3.16664	3.12248	3.09916	3.15445	2.89466	2.97846	2.93111		3.14855	3.00716	3.2405	3.20415	3.35851	3.21953		3.43708	3.38614	3.44957	3.42059	3.45267	3.51283	3.56545	3.44785	3.73586	3.5109	3.35583	3.34888	3.45911	3.50436	2.95282	2.79942	2.67947
Cr2O3	0.415201	0.474557	0.534749	0.627738	0.542475	0.463516	0.516296	0.400646		0.496496	0.594343	0.665419	0.598021	0.58998	0.507406		0.594926	0.637692	0.681834	0.676824	0.718431	0.742522	0.756152	0.751459	0.810221	0.756	0.640282	0.621407	0.707646	0.626875	0.471405	0.377775	0.399969
Fe2O3
FeO	6.34225	6.50972	6.35999	6.4113	6.28231	6.46558	6.37785	6.47538		6.34086	6.13474	6.21123	6.23229	6.26478	6.30476		6.14813	5.88353	6.02178	6.31257	6.23542	6.04723	6.1267	6.40555	6.06413	6.22457	6.14447	6.22061	6.30118	6.08678	6.39505	6.32786	6.49472
MnO	0.142527	0.139423	0.171572	0.147725	0.144629	0.164888	0.16197	0.178208		0.156912	0.169066	0.116637	0.129905	0.178835	0.153164		0.150105	0.147061	0.155731	0.134473	0.153732	0.163046	0.173948	0.144782	0.171069	0.155598	0.132119	0.154147	0.171277	0.157294	0.173036	0.146194	0.150695
MgO	34.2957	34.3304	33.9324	33.9334	34.3059	34.0372	34.5024	34.3675		33.9262	34.0786	33.8603	33.5171	33.7838	33.9655		33.8619	32.8148	33.0825	34.0218	34.1668	32.5628	33.8978	33.9442	32.5783	33.9535	33.8814	33.7128	34.0454	32.9288	34.2525	34.448	34.6189
CaO	0.758055	0.766125	0.770763	0.77631	0.745574	0.71835	0.742555	0.720096		0.775999	0.925348	1.14189	1.39449	0.84614	0.794156		0.937841	2.55276	1.78375	0.628022	0.7135	2.49746	0.678757	0.769424	2.61594	0.633293	0.805464	0.656336	0.67417	2.39052	0.807012	0.704808	0.493587
Na2O	0	0.001834	0	0	0	0.049602	0.011811	-0.00258		0	0	-0.00135	-0.00048	0.0068	0		0	0	-0.00228	0	0	0.012266	0	0.019587	0	0	0	0.011515	-0.00206	0	-0.003	0	-0.00384
total	98.4645	99.0456	98.679	98.5676	98.8272	96.2376	99.4091	99.071		100.443	100.817	100.914	100.294	100.499	100.46		100.125	100.225	99.7194	100.054	100.309	100.093	99.6507	98.4744	100.438	99.9231	99.6036	98.985	99.9796	100.548	99.3075	99.8912	100.291
Si	1.86009	1.85845	1.87308	1.86913	1.86913	1.83113	1.86999	1.87246		1.90376	1.90964	1.90265	1.89711	1.90342	1.90195		1.88941	1.88688	1.88834	1.88667	1.88116	1.88376	1.87922	1.84839	1.87455	1.88265	1.88676	1.88706	1.8802	1.88186	1.87668	1.89451	1.90214
Ti	0.00299837	0.00216921	0.00136233	0.000269643	0.000269643	0	0	0.00026623		0.00380276	0.00162908	0.000554711	0.00246517	0	0.00217178		0.002191	0.00249671	0	0.00137505	0.00164355	0.0016881	0.00165435	0.00112901	0.00168643	0.00192369	0.00165819	0	0.000840263	0.00331614	0.00166912	0.00138065	0
Al	0.125321	0.129465	0.128279	0.127464	0.127464	0.121434	0.121296	0.119807		0.1274	0.121194	0.130558	0.129966	0.135826	0.130194		0.139385	0.137645	0.140745	0.138778	0.139675	0.143128	0.145192	0.141854	0.151728	0.142636	0.136722	0.137267	0.140413	0.142026	0.120511	0.113577	0.108315
Cr	0.0114461	0.0130155	0.0147375	0.0173197	0.0173197	0.0130445	0.014105	0.0109858		0.0134771	0.0160687	0.0179848	0.0162724	0.0160063	0.0137649		0.0161849	0.0173895	0.0186624	0.0184211	0.019497	0.0202954	0.0206565	0.0207405	0.0220749	0.0206041	0.0174996	0.0170869	0.0192698	0.0170435	0.0129064	0.0102819	0.0108464
FeT	0.184937	0.18885	0.185401	0.187106	0.187106	0.192465	0.184302	0.187809		0.182057	0.175437	0.177569	0.179376	0.17978	0.180912		0.176918	0.169705	0.174339	0.18173	0.17899	0.174834	0.177033	0.187004	0.174761	0.179441	0.177632	0.180925	0.181495	0.175043	0.185197	0.182171	0.186295
Mn	0.00420928	0.00409655	0.00506561	0.00436642	0.00436642	0.00497121	0.00474045	0.0052349		0.00456296	0.00489678	0.0033772	0.0037868	0.00519777	0.00445129		0.00437475	0.0042962	0.0045664	0.0039209	0.00446949	0.00477428	0.0050907	0.00428094	0.00499317	0.00454304	0.00386841	0.00454079	0.00499656	0.00458142	0.00507525	0.00426267	0.00437794
Mg	1.78268	1.77536	1.76328	1.76532	1.76532	1.80613	1.77728	1.77686		1.7364	1.73724	1.72558	1.71963	1.72821	1.73736		1.73697	1.68725	1.70734	1.74594	1.74832	1.67819	1.74603	1.7665	1.67362	1.74482	1.74603	1.74789	1.74805	1.68806	1.76822	1.76782	1.77014
Ca	0.0283194	0.0284745	0.0287858	0.0290255	0.0290255	0.0273956	0.0274907	0.0267574		0.0285446	0.0339025	0.0418231	0.0514201	0.0311085	0.0291949		0.0345747	0.0943342	0.0661615	0.0231631	0.0262397	0.0925056	0.0251272	0.0287781	0.0965839	0.0233894	0.0298322	0.0244565	0.0248779	0.088075	0.0299414	0.0259953	0.0181387
Na	0	0.000123352	0	0	0	0.00342321	0.000791285	-0.000173485		0	0	-8.94778e-05	-3.20294e-05	0.000452413	0		0	0	-0.000153036	0	0	0.000822171	0	0.00132573	0	0	0	0.000776464	-0.000137563	0	-0.00020142	0	-0.000255366
tot. cat.	4	4	4	4	4	4	4	4		4	4	4	4	4	4		4	4	4	4	4	4	4	4	4	4	4	4	4	4	4	4	4
tot. oxy.	6	6	6	6	6	6	6	6		6	6	6	6	6	6		6	6	6	6	6	6	6	6	6	6	6	6	6	6	6	6	6

## Sheet: SPO26amp
Line Numbers	51	52	53	55	58	59		46	47	48
X Stage Coordinates	60.8425	60.8246	60.8068	60.771	60.7172	60.6995		61.0219	61.0068	61.1349
Y Stage Coordinates	63.0507	63.0632	63.0755	63.1007	63.138	63.1506		62.9304	62.9366	62.8296
SiO2	37.4359	37.2083	36.8783	36.5689	37.1204	36.4661		38.0767	37.4336	38.0166
TiO2	0.400089	0.210984	0.34791	0.285285	0.126345	0.05335		0.136844	0.190898	0.041434
Al2O3	24.1893	23.9633	23.8697	22.6692	25.4776	23.8797		24.4193	22.1125	25.4185
Fe2O3
FeO	12.0322	11.2952	12.0221	12.9253	9.83086	10.9508		11.1809	13.876	10.1852
MnO	0.150863	0.12082	0.138977	0.170677	0.122954	0.09447		0.175431	0.08659	0.195246
MgO	0.066481	0.076551	0.088984	0.082523	0.033598	0.055378		0.035186	0.016571	0.036522
CaO	24.1768	24.133	24.1106	23.7769	24.57	23.986		24.4316	24.2639	24.5154
Na2O	0.000928	0	0	0.004153	0	0		0	0	0
K2O	0.01065	0.003351	0.000106	0.012689	0.002324	0.004482		0.000985	0	0
Total	98.4633	97.0114	97.4568	96.4958	97.2842	95.4904		98.4569	97.98	98.4089
Si	5.57519	5.60733	5.55773	5.59947	5.53768	5.58209		5.64067	5.66629	5.6037
Ti	0.0448255	0.0239201	0.0394449	0.0328632	0.0141798	0.00614382		0.0152509	0.0217388	0.00459468
Al	4.24572	4.25616	4.23964	4.09096	4.47949	4.30816		4.26344	3.94484	4.41576
Fe+3	0	0	0	0	0	0		0	0	0
Fe+2	1.4986	1.42356	1.51522	1.65518	1.22652	1.40191		1.38522	1.75659	1.25557
Mn	0.0190301	0.015422	0.0177401	0.0221358	0.0155361	0.0122486		0.0220122	0.0111017	0.0243764
Mg	0.0147598	0.017198	0.0199917	0.0188374	0.00747203	0.0126373		0.00777056	0.00373936	0.0080254
Ca	3.85785	3.89675	3.89322	3.90089	3.9273	3.93405		3.87791	3.93524	3.87181
Na	0.000267957	0	0	0.00123294	0	0		0	0	0
K	0.00202338	0.00064424	2.03793e-05	0.00247867	0.00044229	0.000875257		0.000186151	0	0
H	2	2	2	2	2	2		2	2	2
tot. oxy.	23	23	23	23	23	23	23	23	23	23

## Sheet: ICP-MS
SPO-25 Clinopyroxene
	Li	Na2O%	MgO%	Al2O3%	SiO2%	Sc	TiO2%	V	FeO*%	Sr	Y	Zr	Nb	La	Ce	Pr	Nd	Sm	Eu	Gd	Tb	Dy	Ho	Er	Tm	Yb	Lu
SPO25-1_cpx_80um	3.41691	0.0729505	19.7038	2.60617	51.76	48.8494	0.111483	206.647	2.40361	0.300372	5.21548	0.103625		0.00278752	0.00794616		0.0360056	0.111413	0.0680617	0.385712	0.0857594	0.802895	0.203323	0.657533	0.0982214	0.704629	0.0923762
SPO25-3_cpx_40um	5.83868	0.0844065	20.5268	2.8282	51.76	57.0453	0.118457	210.121	2.46385	0.367023	5.76549	0.102375	0.0367648		0.00149133	0.00779549	0.0495842	0.276121	0.080771	0.367754	0.117964	0.925688	0.231191	0.558805	0.0870326	0.890511	0.0851011
SPO25-4_cpx_40um	2.55691	0.0589655	20.4975	2.28805	51.76	54.6236	0.126063	204.963	2.20203	0.325808	6.20017	0.0809861		0.00816455	0.01354	0.011149	0.0354574	0.14809	0.0333297	0.629178	0.110794	0.980564	0.249553	0.735172	0.100936	0.799172	0.107268
SPO25-10_cpx_80um	3.21357	0.0822415	20.4936	2.93082	51.76	52.5971	0.122163	217.981	2.58537	0.312591	5.32451	0.0736519	0	0.00437091	0.0275273	0.0022552	0.0949111	0.101932	0.0704728	0.427759	0.0884113	0.818387	0.228348	0.67344	0.0994961	0.691504	0.0675795
SPO25-11_cpx_80um	4.54172	0.0769108	19.3726	2.82737	51.76	49.9985	0.116719	210.652	2.49622	0.282267	5.24275	0.111644		0.00377078	0.0082876	0.00336942	0.0541835	0.136265	0.06341	0.352876	0.0887926	0.953898	0.211562	0.66852	0.0918788	0.645211	0.0976358
SPO25-12_cpx_80um	4.69903	0.0838718	21.4688	3.032	51.76	53.7686	0.132513	232.846	3.17422	0.30782	5.69134	0.101456		0.00326698	0.0054865	0.00281092	0.05606	0.141088	0.047562	0.399871	0.111082	0.854723	0.23945	0.724207	0.0958496	0.753774	0.0913669
SPO25-13_cpx_80um	5.54014	0.0791809	20.3702	3.06047	51.76	55.5583	0.125631	225.371	2.61979	0.33366	5.68199	0.0731652	0	0.00362658	0.0091356	0.00660299	0.052124	0.0988928	0.0412324	0.390067	0.0996144	0.934726	0.223487	0.728813	0.117911	0.883229	0.109308
SPO-25 Clinopyroxene	Li	Na2O%	MgO%	Al2O3%	SiO2%	Sc	TiO2%	V	FeO*%	Sr	Y	Zr	Nb	La	Ce	Pr	Nd	Sm	Eu	Gd	Tb	Dy	Ho	Er	Tm	Yb	Lu
Average	4.25814	0.0769325	20.3476	2.79615	51.76	53.2058	0.121861	215.512	2.56358	0.318506	5.58882	0.0924146					0.0540465	0.144829	0.0578342	0.421888	0.100345	0.89584	0.226702	0.67807	0.0987608	0.766861	0.0929479
Standard Deviation	1.23217	0.00890623	0.670651	0.270766	7.67474e-15	2.95065	0.00696611	10.3786	0.302023	0.0271667	0.354297	0.0159665					0.0198688	0.0611046	0.0173356	0.0944306	0.0130643	0.0698573	0.015778	0.0615394	0.00970979	0.0952159	0.0141577
% Error	28.9367	11.5767	3.29597	9.6835	1.48275e-14	5.54572	5.71642	4.81579	11.7813	8.52943	6.33939	17.277					36.7624	42.1909	29.9746	22.3828	13.0193	7.79796	6.95981	9.07567	9.83162	12.4163	15.2319
SPO-25 Orthopyroxene
	Li	Na2O%	MgO%	Al2O3%	SiO2%	Sc	TiO2%	V	FeO*%	Sr	Y	Zr	Nb	La	Ce	Pr	Nd	Sm	Eu	Gd	Tb	Dy	Ho	Er	Tm	Yb	Lu
SPO25-14_opx_120um	0.999206	0.00496823	31.6051	2.77906	55.5	28.9514	0.0369433	117.619	5.94981	0.000427502	0.629074	0.0284341	0.00269771	0.00027954					0.000895776	0.0120519	0.00355487	0.086046	0.0226493	0.0984876	0.021872	0.200152	0.034052
SPO25-15_opx_120um	1.37212	0.0196401	34.0483	2.81178	55.5	29.4026	0.0377275	123.106	6.22843	0.0322397	0.674223	0.0139467	0.00330805		0.00778084	0.000328232		0.00406832	0.00284438	0.0147317	0.00420856	0.0465233	0.0243829	0.1096	0.0219778	0.202461	0.0351198
SPO25-16_opx_120um	1.02228	0.0095436	33.4089	1.91043	55.5	24.6879	0.0335958	95.2372	6.08013	0.010573	0.48834	0.00862558		0.000636002	0.000782776	0.000215532	0.00422093	0.00503225	0.00087958	0.00476173	0.00475762	0.0446387	0.0165014	0.0750722	0.021656	0.174919	0.0311369
SPO25-17_opx_120um	1.2527	0.0161003	32.8811	2.88417	55.5	30.5886	0.0384739	117.372	6.14109	0.00806843	0.726482	0.00326913		0.000516531	0.000395568		0.00243772	0.000908213	0.000714353	0.0105642	0.00574436	0.0834758	0.0278546	0.103289	0.0196835	0.253479	0.0441776
SPO25-18_opx_120um	1.07552	0.00222512	32.5474	3.41761	55.5	33.1396	0.0492922	127.582	5.97911	0.00410864	0.96334	0.0450268	0.00316338		0	0.000843832	0.0043509	0.00218909	0.00529025	0.0222298	0.0147056	0.0917365	0.0354399	0.135102	0.0303992	0.265954	0.0445927
SPO25-19_opx_120um	1.34427	0.0046568	32.6615	3.34017	55.5	32.2764	0.0493577	127.781	5.95023	0.00934688	0.945794	0.021607	0.00455557	0.0018292	0.00146861	1.3331e-05	0.0033069	0.00383878	0.00201292	0.0191558	0.00979906	0.0925513	0.0364386	0.14153	0.0307932	0.235563	0.0518619
SPO25-20_opx_120um	1.52561	0.0174216	32.5978	3.41523	55.5	30.9911	0.0459562	126.318	5.77658	0.091426	0.792897	0.0636081	0.00694434	0.0032381	0.261863	0.00170698	0.000341114	0.00379569	0.00199033	0.0210242	0.00786276	0.0950027	0.0285381	0.124397	0.0257119	0.244969	0.044105
SPO25-6_opx_100um	1.69591	0.00397194	33.6655	2.28246	55.5	25.0593	0.0370827	102.848	5.90787	0.00221936	0.465484	0.0197533	0.00303258	0.000610904		0.00021426		0.00511399	0.000870001	0.00891551	0.00254027	0.041932	0.0189253	0.0687473	0.0178226	0.153028	0.0287774
SPO25-7_opx_100um	1.37921	0.00812206	32.4756	2.27485	55.5	25.8868	0.0380678	105.183	5.87726	0.00380058	0.426379	0.0193129	0.001461		0		0.00148806		0.000945114	0.0145279	0.000791503	0.0418497	0.0147911	0.0681958	0.0168585	0.145302	0.0307188
SPO25-9_opx_100um	1.37482	0.0155162	34.0909	1.81143	55.5	23.0603	0.0316166	87.1607	6.12687	0.019225	0.355555	0.0176015	0.000966431			0	6.56221e-05	0.00481161		0.00291859		0.0304738	0.0109546	0.0511708	0.0102458	0.108473	0.0273156
SPO-25 Orthopyroxene	Li	Na2O%	MgO%	Al2O3%	SiO2%	Sc	TiO2%	V	FeO*%	Sr	Y	Zr	Nb	La	Ce	Pr	Nd	Sm	Eu	Gd	Tb	Dy	Ho	Er	Tm	Yb	Lu
Average	1.30416	0.0102166	32.9982	2.69272	55.5	28.4044	0.0398114	113.021	6.00174		0.646757	0.0241185										0.065423	0.0236476	0.0975592	0.0217021	0.19843	0.0371858
Standard Deviation	0.222794	0.0064081	0.789893	0.60153	7.48978e-15	3.49716	0.00623082	14.5236	0.138833		0.213372	0.017902										0.0261888	0.0085553	0.0308972	0.00622098	0.0523691	0.00835087
% Error	17.0833	62.7225	2.39374	22.3391	1.34951e-14	12.312	15.6509	12.8504	2.31322		32.9911	74.2251										40.0299	36.1783	31.6702	28.6654	26.3917	22.4572
SPO-26 Amphibole
		Na2O%	MgO%	Al2O3%	SiO2%	Sc	TiO2%	V	FeO*%	Sr	Y	Zr	Nb	La	Ce	Pr	Nd	Sm	Eu	Gd	Tb	Dy	Ho	Er	Tm	Yb	Lu	Pb
SPO26-1_amph_80um		0.0255931	0.0601857	25.348	37.84	54.4961	0.433797	265.692	10.3017	348.379	45.8105	104.129	0.373286	7.92878	17.4141	2.6987	14.1309	4.66195	1.9419	5.30225	1.10227	7.13308	1.66141	4.52046	0.672047	4.8971	0.760083	3.22939
SPO26-2_amph_80um		0.00695368	0.101515	23.9882	37.84	55.6629	0.232717	265.89	12.1545	411.5	48.9049	70.7911	0.440292	6.82217	14.8947	2.39689	12.8288	4.1153	1.84366	5.66964	1.08878	7.19535	1.79264	5.02475	0.789377	5.53863	0.831149	4.50193
SPO26-3_amph_80um		0.119027	0.106209	23.9439	37.84	84.2997	0.179125	259.37	12.2157	581.588	61.0349	76.7	0.104797	13.6179	28.8187	3.9753	18.7217	6.01729	3.07973	7.79451	1.57963	10.4366	2.31705	6.4415	0.906496	6.63255	0.954481	6.72033
SPO26-4_amph_80um		0.00926063	0.128751	23.033	37.84	75.7699	0.147294	252.93	12.7904	472.421	65.2041	78.7005		12.2081	30.3852	4.05576	19.1902	6.66156	3.27078	8.16701	1.5963	11.1577	2.47374	6.72498	0.962982	6.72773	1.0195	8.57869
SPO26-5_amph_80um		0.029576	0.0665941	24.1939	37.84	56.9306	0.176404	235.239	12.2449	429.2	50.6872	81.4873	0.00485338	7.11382	15.3947	2.19209	10.4665	3.54624	2.01843	5.38131	1.09501	7.65387	1.81521	5.57994	0.807769	6.06437	0.955208	7.69013
SPO26-6_amph_80um		0.550266	0.383598	24.7096	37.84	59.4388	0.36964	254.334	10.3093	615.427	45.9976	80.973	0.914298	10.0283	22.3973	2.96752	14.433	4.72963	2.14288	6.37624	1.19156	8.21848	1.78156	4.7602	0.645681	4.60341	0.748994	3.02665
SPO-26 Amphibole		Na2O%	MgO%	Al2O3%	SiO2%	Sc	TiO2%	V	FeO*%	Sr	Y	Zr	Nb	La	Ce	Pr	Nd	Sm	Eu	Gd	Tb	Dy	Ho	Er	Tm	Yb	Lu	Pb
Average			0.141142	24.2028	37.84	64.433	0.256496	255.576	11.6694	476.419	52.9399	82.1301		9.61983	21.5508	3.04771	14.9618	4.95533	2.3829	6.44849	1.27559	8.63251	1.9736	5.50864	0.797392	5.74397	0.878235	5.62452
Standard Deviation			0.121524	0.780991	7.78361e-15	12.4908	0.117583	11.3599	1.08092	103.187	8.20148	11.45		2.82194	6.79557	0.795046	3.39834	1.17194	0.624439	1.25137	0.244909	1.73633	0.334747	0.908361	0.125078	0.885465	0.113643	2.36391
% Error			86.1003	3.22687	2.05698e-14	19.3857	45.842	4.44482	9.2628	21.6589	15.4921	13.9413		29.3346	31.5328	26.0867	22.7134	23.65	26.205	19.4057	19.1997	20.1138	16.9612	16.4898	15.6859	15.4156	12.9399	42.0287
